## A NURSING PHILOSOPHY OF MOTIVATIONAL INTERVIEWING ON TYPE 2 DIABETES MELLITUS: SYSTEMATIC REVIEW

Elyk Dwi Mumpuningtias<sup>1\*</sup>, Moses Glorino Rumambo Pandin<sup>2</sup>, Nursalam  
Nursalam<sup>3</sup>

<sup>1</sup>Doctoral Student of Nursing, Faculty of Nursing Universitas Airlangga, Jl. Dr. Ir. H. Soekarno, Mulyorejo, Kec. Mulyorejo, Surabaya, East Java 60115

<sup>2</sup>Faculty of Humanities Universitas Airlangga, Jl. Dr. Ir. H. Soekarno, Mulyorejo, Kec. Mulyorejo, Surabaya, East Java 60115

<sup>3</sup>Faculty of Nursing Universitas Airlangga, Jl. Dr. Ir. H. Soekarno, Mulyorejo, Kec. Mulyorejo, Surabaya, East Java 60115

\*Corresponding author: [elyk.dwi.mumpuningtias-2023@fkip.unair.ac.id](mailto:elyk.dwi.mumpuningtias-2023@fkip.unair.ac.id)

### ABSTRACT

**Background:** The management of Type 2 Diabetes Mellitus (T2DM) heavily relies on lifestyle choices and adherence. Opting for a high-risk lifestyle can exacerbate the impact on individuals with T2DM, worsening their condition. These approaches encompass self-care practices, cognitive behavioral strategies, training for family support, and educational initiatives focusing on lifestyle changes. Motivational interviewing is one strategy to changes behavior of T2DM patients.

**Method:** This study reviewed the literature following the PRISMA guidelines (2019–2023). The exploration involved keyword searches for "motivational interviewing," "T2DM," "lifestyle," and "glycemic index" across databases such as Scopus, Science Direct, and ProQuest. Inclusion criteria encompassed quantitative research design, English language publications, research involving patients with T2DM, motivational interviewing, lifestyle modifications, and glycemic index. This resulted in the identification of 286 papers. A PICO synthesis and grouping method was used to analyze the data, aligned with the Cochrane Handbook for Systematic Reviews. The methodological quality assessment, carried out using the Joanna Briggs Institute Critical Appraisal methodology, indicated that adopting a multidisciplinary approach involving ontological, epistemological, and axiological inquiry is a robust foundation for enhancing health information systems and clinical practice.

**Results:** This study reviewed ten articles focusing on using motivational interviewing techniques to improve T2DM patients so that they can change their lifestyle and manage their glycemic index in the long term. Motivational interviewing can be conducted face to face for an average of 10-12 sessions, approximately 3-6 months, both online and through intensive intervention.

**Conclusion:** This study can demonstrate how motivational interviews can improve the behavior of T2DM patients by changing lifestyle and reducing the glycemic index in T2DM patients.

**Keyword:** motivational interviewing, T2DM

NOTE: This preprint reports new research that has not been certified by peer review and should not be used to guide clinical practice.

## BACKGROUND

The management of Type 2 Diabetes Mellitus (T2DM) heavily relies on lifestyle choices and adherence. Opting for a high-risk lifestyle can exacerbate the impact on individuals with T2DM, worsening their condition. According to the American Diabetes Association (ADA) guidelines from 2020, successful interventions have the potential to avert the onset of Type 2 diabetes and associated complications. The chronic care model endorsed by the ADA emphasizes patient-centered care, advocating for self-management strategies. This approach involves collaborative planning within a team context, tailored to respect individuals' unique preferences, values, and specific needs concerning diabetes control (American Diabetes Association, 2020).

Given the prevalence of T2DM and its associated health complications and financial burdens, it becomes crucial to address these challenges indirectly, particularly by encouraging lifestyle modifications. These approaches encompass self-care practices, cognitive behavioral strategies, training for family support, and educational initiatives focusing on lifestyle changes. Implementing effective diabetes management requires lifestyle, behavior, and psychological adjustments. Challenges in adopting behavioral changes can amplify feelings of uncertainty and frustration. Motivational interviewing is an effective collaborative communication style for promoting lifestyle changes in managing T2DM (Bilgin *et al.*, 2022).

Motivational interviewing (MI) is one strategy to enhance individuals' lifestyle choices and adherence to T2DM. MI aids individuals in addressing uncertainties surrounding health and illness linked to their behavior. It is an approach that facilitates adherence to treating chronic conditions like diabetes mellitus (DM). Health professionals utilize MI effectively to enhance an individual's motivation for continuous treatment and care, thereby boosting compliance. Numerous studies demonstrate the positive impact of MI on individual management, showing its assistance in regulating metabolic variables. Systematic reviews and meta-analyses in the literature indicate that MI contributes to reducing HbA1c values, a critical parameter in diabetes management, and positively influences an individual's dietary behavior (Ramadan *et al.*, 2019; Celano *et al.*, 2019).

## METHOD

### Inclusion and exclusion criteria

The methodology involves a literature review exploring pertinent peer-reviewed articles available in Scopus, ProQuest, and ScienceDirect. The inclusion and exclusion criteria are applied by the search and selection criteria. (1) Using PICOS (population, intervention, comparison, outcome, and study design) is one of the inclusion criteria. Population (P) denotes research involving T2DM patients. Intervention (I) encompasses all studies on motivational interviewing in T2DM patients. Motivational interviewing on T2DM patients is crucial to improving lifestyle and adherence and lowering glycemic index. Comparison (C) requires a comparative group for motivational interviewing on T2DM patients. Outcome (O) necessitates research containing analysis supporting motivational interviewing on T2DM patients.

All forms of quantitative studies fall under the category of research design (S). (2) Publications within the past five years, from 2019 to 2023, are considered for inclusion. (3) All publications included must be in English. Exclusion criteria involve protocol studies, conference presentations, editorial and review papers, case reports, case series, and applied design and development.

### **Search strategy**

The research methodology employed in this study involves a literature review. The review article delves into the philosophical examination of applying motivational interviewing to individuals with T2DM, exploring aspects related to their lifestyle and glycemic index from epistemological and ontological perspectives. The researchers utilized the Systematic Review and Meta-Analysis Preferred Reporting Items (PRISMA) guidelines to structure the survey (Page *et al.*, 2021). The literature search strategy encompassed relevant keywords such as "motivational interviewing," "T2DM," "patients," "lifestyle," and "glycemic index," with articles sourced from databases including Scopus, Science Direct, and ProQuest, covering publications from 2019 to 2023. The primary objective of this literature analysis method was to investigate, assess, and amalgamate insights from pertinent literature, aiming to gain deeper insights into how motivational interviewing influences the lifestyle and glycemic index of individuals diagnosed with T2DM within the philosophical framework of nursing science. The study identified 286 articles from databases, with Science Direct contributing 231 articles, ProQuest providing 15, and Scopus contributing 40. The literature search adhered to the minimum requirement of combining the top three databases, as suggested in systematic survey practices (Rethlefsen *et al.*, 2021). Key search terms were selected to align with the research topic, employing keywords like "motivational interviewing," "T2DM," "patient," "lifestyle," and "glycemic index," combined with the boolean operators "AND/OR."

### **Selection of study**

All authors (EDM, NN, and MG) searched academic databases comprehensively. Following this, we proceeded with the article selection process. Reviewer (EDM) utilized Rayyan, an intelligent tool for systematic reviews, to select publications. Rayyan, a mobile and online application designed for systematic reviews (Ouzzani *et al.*, 2016), has demonstrated efficacy in streamlining the review process and easing the workload for reviewers (J. Li *et al.*, 2023). Articles filtered from three extensive databases were imported into the Rayyan platform, resulting in an initial identification of 286 articles. Subsequently, duplicate articles were removed through a meticulous examination. The author (EDM) then individually assessed the titles and abstracts of the remaining articles, adhering to predetermined inclusion criteria. Specifically, the focus was on titles and abstracts related to motivational interviewing on T2DM patients. This rigorous screening process identified ten relevant studies from the significant databases. These selected studies were independently read in their entirety, and upon meeting the criteria, they were included in this systematic review (Figure 1).

### **Risk of bias and research quality**

The analysis adopts PICO synthesis as its methodology. The initial stage of

this synthesis involves extracting the study characteristics—such as population, intervention, comparison, results, and research design—from each acquired article. Subsequently, the Cochrane Handbook for Systematic Reviews (Cumpston *et al.*, 2021) facilitates categorizing these features. The authors then assess the research quality by examining the risk of bias. This assessment aims to evaluate the methodological rigor of the studies and determine the extent to which each study has mitigated potential biases in its design, execution, and analysis. Systematic reviews employ the Joanna Briggs Institute (JBI) critical assessment tool to gauge the risk of bias, aligning it with the specific research design used in each study (Munn *et al.*, 2020). The researchers also used the search criteria of this review literature with the PRISMA flow diagram to obtain a suitable and eligible research article.

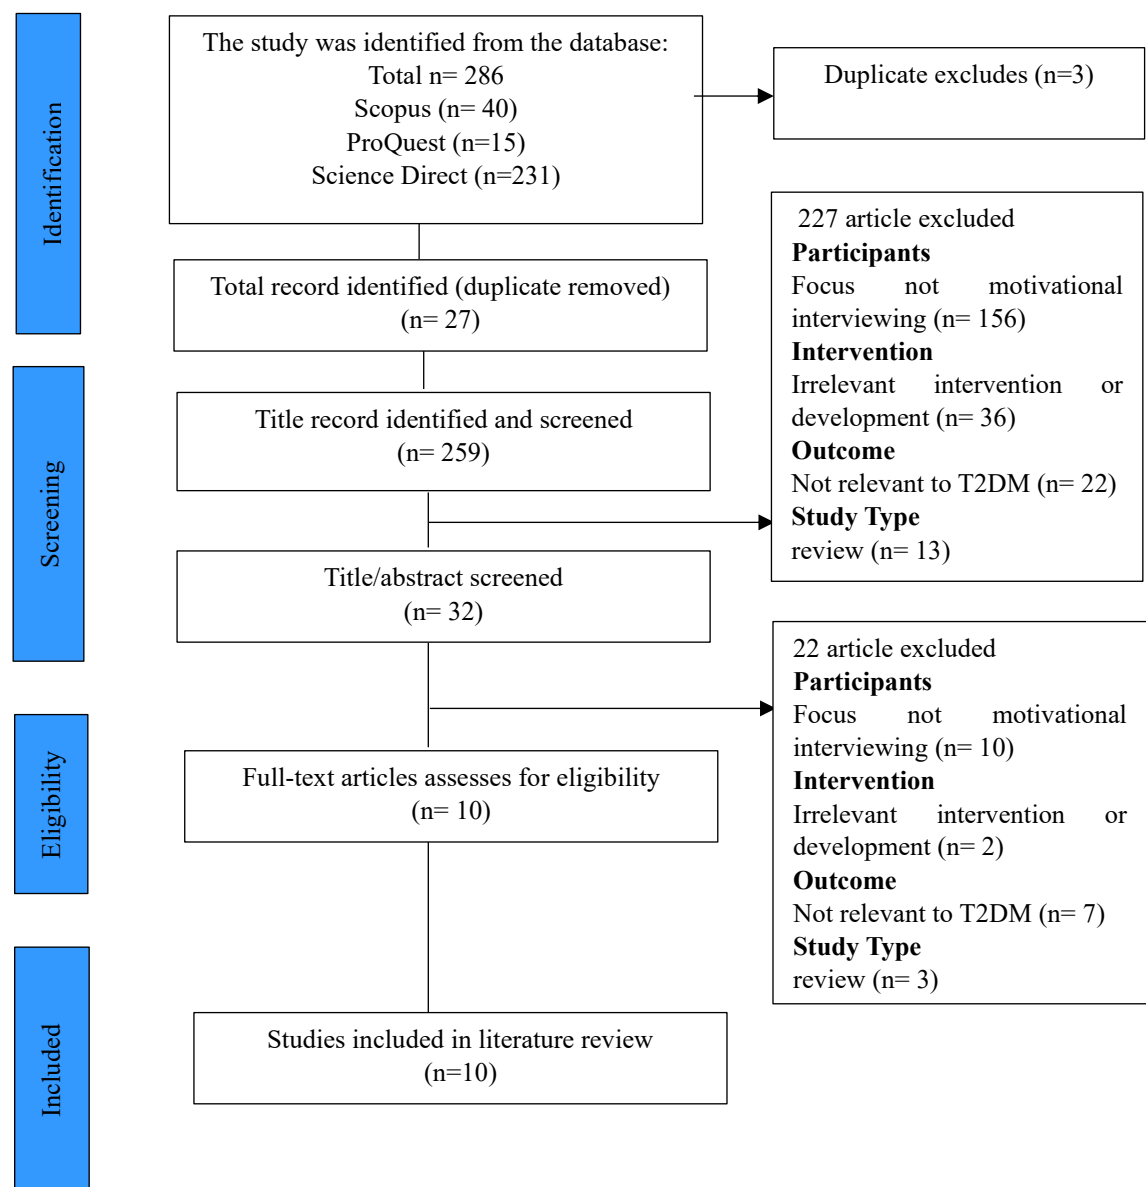

Figure 1. Process flow diagram for PRISMA literature search and filtering

Table 1. Characteristics of reviewed studies

| No | Title<br>(Researcher and year)                                                                                                                                      | Research Design                                                                | Sample                                                                                                                                                                                                                                                                                                             | Intervention                                                                                                                                                                                                                                                                                                                                                                                                       | Research Result                                                                                                                                                                                                                                                                                                                                                                                                                                                      |
|----|---------------------------------------------------------------------------------------------------------------------------------------------------------------------|--------------------------------------------------------------------------------|--------------------------------------------------------------------------------------------------------------------------------------------------------------------------------------------------------------------------------------------------------------------------------------------------------------------|--------------------------------------------------------------------------------------------------------------------------------------------------------------------------------------------------------------------------------------------------------------------------------------------------------------------------------------------------------------------------------------------------------------------|----------------------------------------------------------------------------------------------------------------------------------------------------------------------------------------------------------------------------------------------------------------------------------------------------------------------------------------------------------------------------------------------------------------------------------------------------------------------|
| 1  | Comparing the effectiveness of motivational interviewing and self-development education on type II diabetes mellitus patients's lifestyle (Kazemi & Rahmati, 2021)  | Quasi experiment with a pretest-posttest design and an active comparison group | Thirty-five of T2DM patients who were 35 years old and above, with no other chronic illness and with a history of illness more than a year                                                                                                                                                                         | - Motivational interviewing for 10 sessions (experimental group)<br>- Self-development education for 10 sessions (comparison group)                                                                                                                                                                                                                                                                                | Motivational interviewing diverges from self-development education in its impact on altering the lifestyle of individuals with Type 2 Diabetes Mellitus (T2DM). Specifically, motivational interviewing, as opposed to self-development education, prompts changes in lifestyle by influencing the Theory of Planned Behavior (TPB) variables such as attitude, perceived behavioral control, and behavioral intention.                                              |
| 2  | Effectiveness of motivational interviewing on improving Care for Patients with type 2 diabetes in China: A randomized controlled trial (Z. Li <i>et al.</i> , 2020) | A randomized controlled trial                                                  | Two thousand and twenty-five individuals diagnosed with T2DM, aged between 18 and 75 years old, having HbA1c levels ranging from 7 to 10%, and without notable severe accompanying conditions like cancer, unstable angina, frequent chronic obstructive pulmonary disease exacerbations, or diabetic retinopathy. | - The experiment group participated in a small-group educational program limited to no more than 10 participants, structured around principles derived from both Motivational Interviewing (MI) theory and the theory of patient empowerment.<br>- The control group received conventional lectures focused solely on delivering healthcare information to the patients without additional elements or strategies. | At post-intervention and the 3-month follow-up, the PAID score improved significantly in the intervention Group compared to the control group. No difference was found between groups for changes to exercise, diet, and medication adherence. The PEI score improved significantly at the 3-month follow-up in the MI group. motivational interviewing (MI)-based patient empowerment program (PEP) has a significant effect on improving diabetes-related distress |
| 3  | Motivational Interviewing in the Management of Type                                                                                                                 | A double-blind parallel-group of                                               | 174 participants with T2DM                                                                                                                                                                                                                                                                                         | Participants were randomly assigned to either the experimental group, which received                                                                                                                                                                                                                                                                                                                               | Concerning systolic and diastolic blood pressure and a boost in the overall adherence score, measured                                                                                                                                                                                                                                                                                                                                                                |

| No | Title<br>(Researcher and year)                                                                                                                                          | Research Design                                                         | Sample                                                                                                                                                   | Intervention                                                                                                                                                                                                                                                                                                                                                                                                                  | Research Result                                                                                                                                                                                                                                                                                                                             |
|----|-------------------------------------------------------------------------------------------------------------------------------------------------------------------------|-------------------------------------------------------------------------|----------------------------------------------------------------------------------------------------------------------------------------------------------|-------------------------------------------------------------------------------------------------------------------------------------------------------------------------------------------------------------------------------------------------------------------------------------------------------------------------------------------------------------------------------------------------------------------------------|---------------------------------------------------------------------------------------------------------------------------------------------------------------------------------------------------------------------------------------------------------------------------------------------------------------------------------------------|
| 2  | Diabetes Mellitus and Arterial Hypertension in Primary Health Care (Steffen <i>et al.</i> , 2021).                                                                      | randomized controlled trial                                             | and an associated diagnosis of AH (usual-care group=80; test/motivational interviewing group=94).                                                        | nursing consultation based on motivational interviewing delivered by professionals with 20 hours of training, or the control group, which received standard nursing consultation following conventional practices.                                                                                                                                                                                                            | through the Martín-Bayarre-Grade questionnaire. Specifically, within the operational dimensions of treatment adherence and personal involvement, improvements were notable in the test/motivational interviewing group. Moreover, according to the study's conclusion, this group exhibited a noteworthy reduction in HbA1c levels by 0.4%. |
| 4  | A Randomized Controlled Trial of a Motivational Interviewing Intervention to Improve Whole-Person Lifestyle (Sawyer <i>et al.</i> , 2020)                               | a parallel randomized controlled trial with an allocation ratio of 1:1. | 138 participants were diagnosis of type 2 diabetes, fasting glucose >125 mg/dL, or HbA1c >6.5% and/or diagnosis of hypertension and age 18 years or over | Intervention group participants attended 6 assessment and coaching sessions with the program specialist over a 6-month period, including 1 initial assessment at baseline, four 60-minute motivational interviewing sessions, and 2 reassessments at 3 months and 6 months after baseline assessment. Control group participants only attended the assessment sessions at baseline, 3-month follow-up, and 6-month follow-up. | A whole-person lifestyle intervention with motivational interviewing for patients with hypertension and/or type 2 diabetes can improve one's health in terms of components in the CVD risk profile, as well as overall wellness                                                                                                             |
| 5  | The Effect of a New Structured Motivational Interview Model on Diet and Exercise Behaviors in Type 2 Diabetes Patients at Primary Care (Delibalta <i>et al.</i> , 2023) | a single-blind, randomized controlled study                             | Eighty T2DM patients in primary care were included in the study for both intervention and control groups                                                 | The intervention group received a motivating interview-based intervention a total of 4 times in the 1 <sup>st</sup> month of the study and followed up in the 3 <sup>rd</sup> month. The control group was followed by family physicians and evaluated at 3 months without any motivational intervention. One-week pedometer,                                                                                                 | There was a significant difference between the control and intervention groups in terms of a 1-week pedometer (2785.0 [1002.0-7240.0] step/day vs. 5231.0 [1364.0-11827.0] step/day, p<0.001), IPAQ2 scores (0.0 [0.0-1056.0] vs. 495.0 [0.0-1396.0], p<0.001), EQ5D scale total scores (5.0 [5.0-10.0] vs. 5.0 [5.0-8.0],                  |



| No | Title<br>(Researcher<br>and year)                                                                                                                                                                 | Research<br>Design                                                        | Sample                                                                                                                  | Intervention                                                                                                                                                                                                                                                                                            | Research Result                                                                                                                                                                                                                                                                                                                                                                                                                                                                              |
|----|---------------------------------------------------------------------------------------------------------------------------------------------------------------------------------------------------|---------------------------------------------------------------------------|-------------------------------------------------------------------------------------------------------------------------|---------------------------------------------------------------------------------------------------------------------------------------------------------------------------------------------------------------------------------------------------------------------------------------------------------|----------------------------------------------------------------------------------------------------------------------------------------------------------------------------------------------------------------------------------------------------------------------------------------------------------------------------------------------------------------------------------------------------------------------------------------------------------------------------------------------|
|    |                                                                                                                                                                                                   |                                                                           |                                                                                                                         | international physical activity questionnaire (IPAQ2) scores, daily calorie intake, EuroQol (EQ5D), multidimensional diabetes questionnaire (MDQ), and motivational assessment scale were used at the beginning of the study and the 3 <sup>rd</sup> -month follow-up.                                  | p=0.006), and MDQ scale total scores (607.0 [244.0-847.0] vs. 730.0 [235.0-847.0], p<0.001) at the 3 <sup>rd</sup> -month follow-up.                                                                                                                                                                                                                                                                                                                                                         |
| 6  | A randomized controlled trial comparing community lifestyle interventions to improve adherence to diet and physical activity recommendations: the VitalUM study (van Keulen <i>et al.</i> , 2021) | A randomized controlled trial                                             | 1629 T2DM patients were 45-70 years old with hypertensive according to the International Classification of Primary Care | Study groups received either four computer-tailored print communication (TPC) letters ( $n = 405$ ), four telephone motivational interviewing (TMI) sessions ( $n = 407$ ), a combined intervention (two TPC letters and two TMI sessions, $n = 408$ ), or no intervention (control group, $n = 409$ ). | TPC, TMI and combination of TMPC with TMI interventions were associated with better guideline adherence than no intervention. Odds ratios for TPC, TMI and the combined intervention were 1.82 (95% CI 1.31; 2.54), 1.57 (95% CI 1.13; 2.18), and 2.08 (95% CI 1.50; 2.88), respectively                                                                                                                                                                                                     |
| 7  | Motivation Interview Effectiveness and Optimism Efficiency on the Quality of Life of Type 2 Diabetes Mellitus (Amiruddin <i>et al.</i> , 2021)                                                    | Quasi Experimental - Non-Randomized Control Group Pretest Posttest Design | T2DM patients, while the treatment was carried out on 50 respondents                                                    | Interventions were given in motivational interviews and the effectiveness of optimism                                                                                                                                                                                                                   | The statistical test of the difference between the two independent means showed the sig. value (two tailed) of 0.006. It pointed to a significant difference in post-test between DM patients' quality of life in the intervention and control groups. Based on the two dependent difference-test, the mean showed that the value of sig. (two tailed) 0.000 means a significant difference between DM patients' quality of life in the intervention and control groups after the post-test. |
| 8  | Effects of Telephone-Based Brief Motivational Interviewing on                                                                                                                                     | A single group study                                                      | 29 patients with uncontrolled T2DM recruited                                                                            | Participants received usual care during the first 4 weeks, followed by usual care plus brief MI during weeks 4-8.                                                                                                                                                                                       | Medication adherence demonstrated significant differences between the 4-week and 8-week periods ( $p < 0.05$ ), as well as                                                                                                                                                                                                                                                                                                                                                                   |

| No | Title<br>(Researcher<br>and year)                                                                                                                                                     | Research<br>Design                                           | Sample                                                      | Intervention                                                                                                                                                                                                                                                                                                                                                                                                                                                                                                                                                                                                                                                                                             | Research Result                                                                                                                                                                                                                                                                                                                                                                                                                                                                                                                                                                                                           |
|----|---------------------------------------------------------------------------------------------------------------------------------------------------------------------------------------|--------------------------------------------------------------|-------------------------------------------------------------|----------------------------------------------------------------------------------------------------------------------------------------------------------------------------------------------------------------------------------------------------------------------------------------------------------------------------------------------------------------------------------------------------------------------------------------------------------------------------------------------------------------------------------------------------------------------------------------------------------------------------------------------------------------------------------------------------------|---------------------------------------------------------------------------------------------------------------------------------------------------------------------------------------------------------------------------------------------------------------------------------------------------------------------------------------------------------------------------------------------------------------------------------------------------------------------------------------------------------------------------------------------------------------------------------------------------------------------------|
|    | Self-Management, Medication Adherence, and Glycemic Control in Patients with Uncontrolled Type 2 Diabetes Mellitus in a Rural Community in Thailand (Sawaengsri <i>et al.</i> , 2023) |                                                              | from a rural primary care setting in Nakhon Sawan, Thailand | Outcomes of self-management, medication adherence, fasting blood sugar (FBS) levels, and HbA1c levels were assessed at baseline, 4 weeks, and 8 weeks                                                                                                                                                                                                                                                                                                                                                                                                                                                                                                                                                    | between baseline and the 8-week mark ( $p < 0.001$ ). FBS levels exhibited significant differences between the 4-week and 8-week intervals ( $p < 0.05$ ). Although there was a decline in HbA1c levels during the 8-week study, this reduction was not statistically significant                                                                                                                                                                                                                                                                                                                                         |
| 9  | Glycemic Regulation in Patients with Type 2 Diabetes Mellitus: Effect of Motivational Interviewing (Kiral & Cansu, 2022)                                                              | A retrospective study                                        | Seventy-six of T2DM patients at a family health center      | Patient interviews were carried out utilizing a method devised by Miller and Rollnick within the standard outpatient clinic framework, comprising sessions that lasted, on average, about 15 minutes. The application of Motivational Interviewing (MI) contained four distinct phases: engagement, focusing, evocation, and planning, occasionally presenting an intertwined or varying sequence of occurrence. In the engagement phase, emphasis was placed on establishing a shared language and fostering a collaborative atmosphere. Face-to-face interviews took place in an environment without physical barriers, such as a table, aiming to develop rapport founded on mutual trust and respect | In the Motivational Interviewing (MI) group, individuals diagnosed with Type 2 Diabetes Mellitus (T2DM) had an average follow-up duration of $22.63 \pm 11.93$ (ranging from 3 to 38) months, whereas, in the non-MI group, the mean follow-up duration was $24.33 \pm 11.29$ (ranging from 3 to 36) months ( $p=0.489$ ). By the conclusion of this follow-up period, the HbA1c level decreased from $8.30 \pm 2.10\%$ to $7.68 \pm 1.48\%$ in the MI group ( $p=0.006$ ). Conversely, the non-MI group declined from $8.12 \pm 2.14\%$ to $7.93 \pm 1.16\%$ , which did not show statistical significance ( $p=0.504$ ) |
| 10 | The Effects of Motivational Interview on Healthy                                                                                                                                      | The semi-experimental study was designed with a pre-test and | 30 individuals who could be connected among 44              | Six sessions of motivational interviews, each lasting 120 minutes, were carried out with                                                                                                                                                                                                                                                                                                                                                                                                                                                                                                                                                                                                                 | The research indicated a statistically noteworthy contrast between the scores of individuals on both scales and their pre-                                                                                                                                                                                                                                                                                                                                                                                                                                                                                                |



| No | Title<br>(Researcher<br>and year)                                                                | Research<br>Design          | Sample                                            | Intervention                                                                                                                                                                              | Research Result                                                                                                                                                                                                                                |
|----|--------------------------------------------------------------------------------------------------|-----------------------------|---------------------------------------------------|-------------------------------------------------------------------------------------------------------------------------------------------------------------------------------------------|------------------------------------------------------------------------------------------------------------------------------------------------------------------------------------------------------------------------------------------------|
|    | Behaviour and Quality of Life in the Uncontrolled Type 2 Diabetes Patients (Oz & Buyuksoy, 2022) | post-test in a single group | type 2 diabetes patients at high risk of diabetes | participants focusing on managing Type 2 diabetes. Data for the study were gathered utilizing the Healthy Lifestyle Behaviors Scale II and the WHO Healthy Lifestyle Behaviors Scale BREF | test and post-test scores across all respective sub-dimensions ( $p < 0.05$ ). Consequently, the findings suggested that motivational interviews enhanced individuals' healthy lifestyle behaviors and augmented their overall quality of life |

## RESULTS AND DISCUSSION

The researchers used the PRISMA flow diagram and literature review search criteria to identify appropriate research articles that met the requirements. These articles aim to understand the effectiveness of motivational interviewing in improving lifestyle, compliance, and reducing the glycemic index of T2DM patients. This approach further strengthens the nursing science philosophy's importance in addressing these needs.

### **Ontological study of motivational interviewing on improving lifestyle and lowering glycemic index of T2DM patients**

The structure and hierarchy of concepts in motivational interviewing are analyzed in an ontological study of patients with T2DM. As a branch of philosophy, ontology examines the truth of the existence and relationships between entities. In ontological studies from motivational interviews of T2DM patients, the focus is on lifestyle changes, including self-care techniques, cognitive behavioral techniques, family support training, and lifestyle education (Bakır *et al.*, 2021)

This research provides a conceptual basis for the design application of motivational interviewing to T2DM patients from an ontological perspective. By understanding its ontological structure, health professionals can effectively integrate these concepts into clinical practice, improving the quality of patient care for T2DM patients and supporting further development of efficient health information systems. Improving the quality of care for T2DM patients involves cross-sectoral collaboration, including medical personnel, patients, families, and health service facilities. This includes routine training of medical personnel, formation of a holistic care team, the implementation of standard care protocols, periodic evaluation and monitoring, integration health technology, education for patients and families, and coordinated rehabilitation programs. As revealed in the research, motivational interviewing is defined as finding and eliminating doubts and increasing motivation to change. Motivational interviewing includes collaborative efforts, client-centeredness, non-judgment, building trust, reducing resistance, increasing readiness to change, increasing self-efficacy, increasing perceptions of incongruity, reflective listening, conversational invitations to change, discovery, and empathetic listening (Oz & Buyuksoy, 2022; (El-Sappagh *et al.*, 2018).

### **Epistemological study of motivational interviewing on improving lifestyle and**

## **lowering glycemic index of T2DM patients**

Epistemological research concerning motivational interviewing in patients with Type 2 Diabetes Mellitus (T2DM) aims to delve deeply into the nature of knowledge associated with this approach. Epistemology, a philosophical discipline, examines the sources, boundaries, and fundamental learning principles. Within the context of epistemological investigation concerning motivational interviewing in T2DM patients, the emphasis is placed on how knowledge pertinent to this process is acquired, comprehended, and justified. Through an epistemological lens, this research provides insight into the origins and attributes of knowledge concerning motivational interviewing in T2DM patients, explicitly aiming to enhance lifestyle improvements and glycemic control. This approach seeks to improve comprehension of how this knowledge is applied and assessed in healthcare practices, thereby stimulating considerations on improving these processes using an epistemological method in the exploration and study of motivational interviewing in T2DM patients (Adailton da Silva *et al.*, 2018).

To acquire, comprehend, and authenticate knowledge associated with applying motivational interviewing to enhance lifestyle and glycemic control in T2DM patients, we can undertake several steps that can be conducted by engaging in an in-depth review of the latest health literature, including books, journals, and research articles discussing the application of motivational interviewing in T2DM patients. This step aids in understanding current scientific foundations and practices in this domain. Firstly, participate in seminars, conferences, or workshops on T2DM management to engage with experts directly, interact, and exchange experiences with fellow healthcare professionals. In addition, seek guidance from healthcare practitioners such as doctors, nurses, psychologists, and other professionals experienced in treating T2DM patients to gain practical insights and learn from their clinical expertise. Furthermore, utilize reliable online resources like health organization websites, medical institutions, or research centers offering up-to-date and verified information for managing T2DM patients. In conclusion, refer to guidelines and service standards issued by national and international health institutions, like the American Diabetes Association (ADA), to align with recognized protocols and practices (Mureyi *et al.*, 2022).

## **Axiological of motivational interviewing on improving lifestyle and lowering glycemic index of T2DM patients**

An axiological exploration concerning the application of motivational interviewing to enhance lifestyle and glycemic control in T2DM patients will involve an analysis of the moral values and principles intrinsic to the motivational interviewing process in this patient population. Axiology, a philosophical branch, specifically investigates moral values. The axiological scrutiny involving motivational interviewing in T2DM patients focuses on understanding how these values impact and shape nursing practices. The aim is to pinpoint the fundamental values that underpin motivational interviewing in T2DM patients, namely Acceptance, Partnership, Compassion, and Evocation. The analysis aims to elucidate how these values influence interactions between nurses and patients throughout the therapeutic process, particularly their impact on communication, collaborative decision-making, and empowering behavioral changes (Van Wormer, 2007).

According to research, education is of significant value for T2DM patients due to its role as an indicator of patients' comprehension of care, self-management, and glycemic control. The willingness of T2DM patients to embrace health information

correlates with their adoption of healthier lifestyle behaviors, leading to an enhanced quality of life. Maintaining controlled blood glucose levels and stable health status aligns with patients' openness to health education. Besides education, cultural and personal values significantly influence motivational interviewing's efficacy in altering individuals' behaviors. Subjective value judgments and the prevailing societal culture are pivotal in shaping individuals' daily practices (Steffen *et al.*, 2021). Studies have indicated that cultural aspects are critical considerations for the effectiveness of motivational interviews, particularly in influencing behavior change. For instance, research illustrated that motivational interviews weren't effective in promoting healthy lifestyle behaviors among individuals at risk of diabetes in South Asia. Moreover, most individuals did not continue with the discussions, indicating the necessity to account for cultural characteristics to ensure the effectiveness of interventions (Magill & Hallgren, 2019; Amiruddin *et al.*, 2021).

### **Motivational interviewing on improving lifestyle and lowering glycemic index of T2DM patients**

Lifestyle is crucial in managing Type 2 Diabetes Mellitus (T2DM). Opting for a high-risk lifestyle can exacerbate its impact on individuals with T2DM. Implementing self-care techniques, cognitive behavioral strategies, family support training, and lifestyle education becomes imperative to enhance the lifestyle and glycemic control of T2DM patients. Motivational interviewing is an alternative approach to foster behavioral changes among individuals with T2DM. This technique identifies and resolves uncertainties while amplifying the motivation to instigate change. Components integral to motivational interviewing encompass collaborative efforts, client-centeredness, non-judgmental attitudes, building trust, mitigating resistance, enhancing readiness for change, bolstering self-efficacy, recognizing discrepancies, engaging in reflective listening, employing conversational prompts for change, fostering discovery, and empathetic listening (Delibalta *et al.*, 2023). Regarding behavioral alterations correlated with the lifestyle of T2DM patients, motivation proves to be more effective than knowledge. Among the five factors influencing behavior—awareness, social norms, perceived behavioral control, attitudes, and behavioral intentions—motivation outweighs the ability to facilitate changes to a patient's lifestyle. While increased knowledge contributes to positive lifestyle behaviors, particularly in chronic conditions like diabetes, it's more impactful in endorsing positive behaviors than eliminating negative habits linked to adverse physical conditions. Overcoming ingrained negative habits and burdensome lifestyles is significantly more influenced by motivation than mere knowledge (Kazemi & Rahmati, 2021).

Motivational interviewing is a practical collaborative communication approach to foster lifestyle modifications in Type 2 Diabetes Mellitus (T2DM) management. The research indicated noticeable differences between the control and test/MI groups in blood pressure and compliance scores following an average six-month follow-up. Notably, there was a significant reduction of 0.4% in HbA1c levels among participants who underwent motivational interviewing. This decrease holds clinical significance, particularly considering motivational interviewing is integrated as a supplementary

and routine component in diabetes management within primary healthcare settings. In primary healthcare, nursing consultation based on motivational interviewing was proven to be a more efficacious care strategy than standard care in enhancing blood pressure levels and compliance rates among individuals diagnosed with T2DM (Steffen *et al.*, 2021).

## CONCLUSION

Review of the literature with a focus on improving lifestyle and lowering glycemic index of T2DM patients by motivational interviewing. This study can demonstrate how motivational interviews can improve the behavior of T2DM patients by changing lifestyle and reducing the glycemic index in T2DM patients.

## ACKNOWLEDGMENTS

Thank you to the nursing lecturers at Airlangga University and very grateful that the Faculty of Nursing at Airlangga University has provided facilities for this research

## CONFLICT OF INTEREST

None

## REFERENCES

- Adailton da Silva, J., Fagundes de Souza, E. C., Echazú Böschmeier, A. G., Maia da Costa, C. C., Souza Bezerra, H., & Lopes Cavalcante Feitosa, E. E. (2018). Diagnosis of diabetes mellitus and living with a chronic condition : participatory study. *BMC Public Health*, 18(699), 1–8. <https://www.ncbi.nlm.nih.gov/pmc/articles/PMC5989432/>
- American Diabetes Association. (2020). 1. Improving care and promoting health in populations: Standards of medical care in diabetes-2020. *Diabetes Care*, 43(January), S7–S13. <https://doi.org/10.2337/dc20-S001>
- Amiruddin, R., Jafar, N., Ansar, J., & Tasya, Z. (2021). Motivation interview effectiveness and optimism efficiency on the quality of life of type 2 diabetes mellitus. *Open Access Macedonian Journal of Medical Sciences*, 9, 402–405. <https://doi.org/10.3889/oamjms.2021.6007>
- Bakır, E., Çavuşoğlu, H., & Mengen, E. (2021). Effects of the Information–Motivation–Behavioral Skills Model on Metabolic Control of Adolescents with Type 1 Diabetes in Turkey: Randomized Controlled Study. *Journal of Pediatric Nursing*, 58, e19–e27. <https://doi.org/10.1016/j.pedn.2020.11.019>
- Bilgin, A., Muz, G., & Yuce, G. E. (2022). The effect of motivational interviewing on metabolic control and psychosocial variables in individuals diagnosed with diabetes: Systematic review and meta-analysis. *Patient Education and Counseling*, 105(9), 2806–2823. <https://doi.org/10.1016/j.pec.2022.04.008>
- Celano, C. M., Gianangelo, T. A., Millstein, R. A., Chung, W.-J., Wexler, D. J., Park, E. R., & Huffman, J. C. (2019). A positive psychology–motivational interviewing intervention for patients with type 2 diabetes: Proof-of-concept trial. *International Journal of Psychiatry in Medicine*, 54(2), 97–114. <https://doi.org/10.1177/0091217418791448>
- Cumpston, M. S., McKenzie, J. E., Thomas, J., & Brennan, S. E. (2021). Current practice in systematic reviews including the ‘PICO for each synthesis’ and methods other than meta-analysis: protocol for a cross-sectional study [version 1; peer review: awaiting peer review]. *F1000Research*, 9, 1–9.

- <https://doi.org/10.12688/F1000RESEARCH.24469.1>
- Delibalta, B., Akturan, S., & Akman, M. (2023). The Effect of a New Structured Motivational Interview Model on Diet and Exercise Behaviors in Type 2 Diabetes Patients at Primary Care: A Randomized Controlled Study. *Anatolian Journal of Family Medicine*, 6(2), 52–60. <https://doi.org/10.5505/anatoljfm.2023.54871>
- El-Sappagh, S., Kwak, D., Ali, F., & Kwak, K. S. (2018). DMTO: A realistic ontology for standard diabetes mellitus treatment. *Journal of Biomedical Semantics*, 9(1), 1–30. <https://doi.org/10.1186/s13326-018-0176-y>
- Kazemi, J., & Rahmati, F. (2021). Comparing the effectiveness of motivational interviewing and self-development education on type II diabetes mellitus patients' lifestyle. *Journal of Education and Health Promotion*, 10(1). [https://doi.org/10.4103/jehp.jehp\\_860\\_20](https://doi.org/10.4103/jehp.jehp_860_20)
- Kiral, M. A., & Cansu, G. B. (2022). Glycemic Regulation in Patients With Type 2 Diabetes Mellitus: Effects of Motivational Interviewing. *Ankara Medical Journal*, 22(3), 336–346. <https://doi.org/10.5505/amj.2022.87854>
- Li, J., Kabouji, J., Bouhadoun, S., Tanveer, S., Filion, K. B., Gore, G., Josephson, C. B., Kwon, C.-S., Jette, N., Bauer, P. R., Day, G. S., Subota, A., Roberts, J. I., Lukmanji, S., Sauro, K., Ismaili, A. A., Rahmani, F., Chelabi, K., Kerdougli, Y., ... Keezer, M. R. (2023). Sensitivity and specificity of alternative screening methods for systematic reviews using text mining tools. *Journal of Clinical Epidemiology*, 162, 72–80. <https://doi.org/https://doi.org/10.1016/j.jclinepi.2023.07.010>
- Li, Z., Chen, Q., Yan, J., Liang, W., & Wong, W. C. W. (2020). Effectiveness of motivational interviewing on improving Care for Patients with type 2 diabetes in China: A randomized controlled trial. *BMC Health Services Research*, 20(1). <https://doi.org/10.1186/s12913-019-4776-8>
- Magill, M., & Hallgren, K. A. (2019). Mechanisms of behavior change in motivational interviewing: do we understand how MI works? *Current Opinion in Psychology*, 30, 1–5. <https://doi.org/10.1016/j.copsyc.2018.12.010>
- Munn, Z., Barker, T. H., Moola, S., Tufanaru, C., Stern, C., McArthur, A., Stephenson, M., & Aromataris, E. (2020). Methodological quality of case series studies: an introduction to the JBI critical appraisal tool. *JBIC Evidence Synthesis*, 18(10), 2127–2133. <https://doi.org/10.11124/JBISIR-D-19-00099>
- Mureyi, D., Katena, N. A., & Monera-Penduka, T. (2022). Perceptions of diabetes patients and their caregivers regarding access to medicine in a severely constrained health system: A qualitative study in Harare, Zimbabwe. *PLOS Global Public Health*, 2(3), e0000255. <https://doi.org/10.1371/journal.pgph.0000255>
- Ouzzani, M., Hammady, H., Fedorowicz, Z., & Elmagarmid, A. (2016). Rayyan—a web and mobile app for systematic reviews. *Systematic Reviews*, 5(1), 210. <https://doi.org/10.1186/s13643-016-0384-4>
- Oz, H. S., & Buyuksoy, G. D. (2022). The Effects of Motivational Interview on Healthy Behaviour and Quality of Life in the Uncontrolled Type 2 Diabetes Patients. *International Journal of Caring Sciences*, 15(2), 1194–1201. <http://moxy.eclibrary.ca/login?url=https://search.ebscohost.com/login.aspx?direct=true&db=cin20&AN=159484052&site=ehost-live&scope=site>
- Page, M. J., McKenzie, J. E., Bossuyt, P. M., Boutron, I., Hoffmann, T. C., Mulrow, C. D., Shamseer, L., Tetzlaff, J. M., Akl, E. A., Brennan, S. E., Chou, R., Glanville, J., Grimshaw, J. M., Hróbjartsson, A., Lalu, M. M., Li, T., Loder, E. W., Mayo-Wilson, E., McDonald, S., ... Moher, D. (2021). The PRISMA 2020 statement: an updated guideline for reporting systematic reviews. *BMJ*, 372, n71. <https://doi.org/10.1136/bmj.n71>
- Ramadan, R. M. E., Mohammed, L., & Ali, G. (2019). *The Efficacy of Motivational Interviewing on Glycemic Control for Patients with Diabetes*. 6(1), 706–718.
- Rethlefsen, M. L., Kirtley, S., Waffenschmidt, S., Ayala, A. P., Moher, D., Page, M. J.,



- Koffel, J. B., Blunt, H., Brigham, T., Chang, S., Clark, J., Conway, A., Couban, R., de Kock, S., Farrah, K., Fehrmann, P., Foster, M., Fowler, S. A., Glanville, J., ... Group, P.-S. (2021). PRISMA-S: an extension to the PRISMA Statement for Reporting Literature Searches in Systematic Reviews. *Systematic Reviews*, 10(1), 39. <https://doi.org/10.1186/s13643-020-01542-z>
- Sawaengsri, N., Maneesriwongul, W., Schorr, E. N., & Wangpitipanit, S. (2023). Effects of Telephone-Based Brief Motivational Interviewing on Self-Management, Medication Adherence, and Glycemic Control in Patients with Uncontrolled Type 2 Diabetes Mellitus in a Rural Community in Thailand. *Patient Preference and Adherence*, 17, 2085–2096. <https://doi.org/10.2147/PPA.S418514>
- Sawyer, A. T., Wheeler, J., Jennelle, P., Pepe, J., & Robinson, P. S. (2020). A Randomized Controlled Trial of a Motivational Interviewing Intervention to Improve Whole-Person Lifestyle. *Journal of Primary Care and Community Health*, 11. <https://doi.org/10.1177/2150132720922714>
- Steffen, P. L. S., Mendonça, C. S., Meyer, E., & Faustino-Silva, D. D. (2021). Motivational Interviewing in the Management of Type 2 Diabetes Mellitus and Arterial Hypertension in Primary Health Care: An RCT. *American Journal of Preventive Medicine*, 60(5), e203–e212. <https://doi.org/https://doi.org/10.1016/j.amepre.2020.12.015>
- van Keulen, H. M., van Breukelen, G., de Vries, H., Brug, J., & Mesters, I. (2021). A randomized controlled trial comparing community lifestyle interventions to improve adherence to diet and physical activity recommendations: the VitalUM study. *European Journal of Epidemiology*, 36(3), 345–360. <https://doi.org/10.1007/s10654-020-00708-2>
- Van Wormer, K. (2007). Motivational Interviewing: A Theoretical Framework for the Study of Human Behavior and the Social Environment. *Advances in Social Work*, 8(1), 19–29. <https://doi.org/10.18060/129>



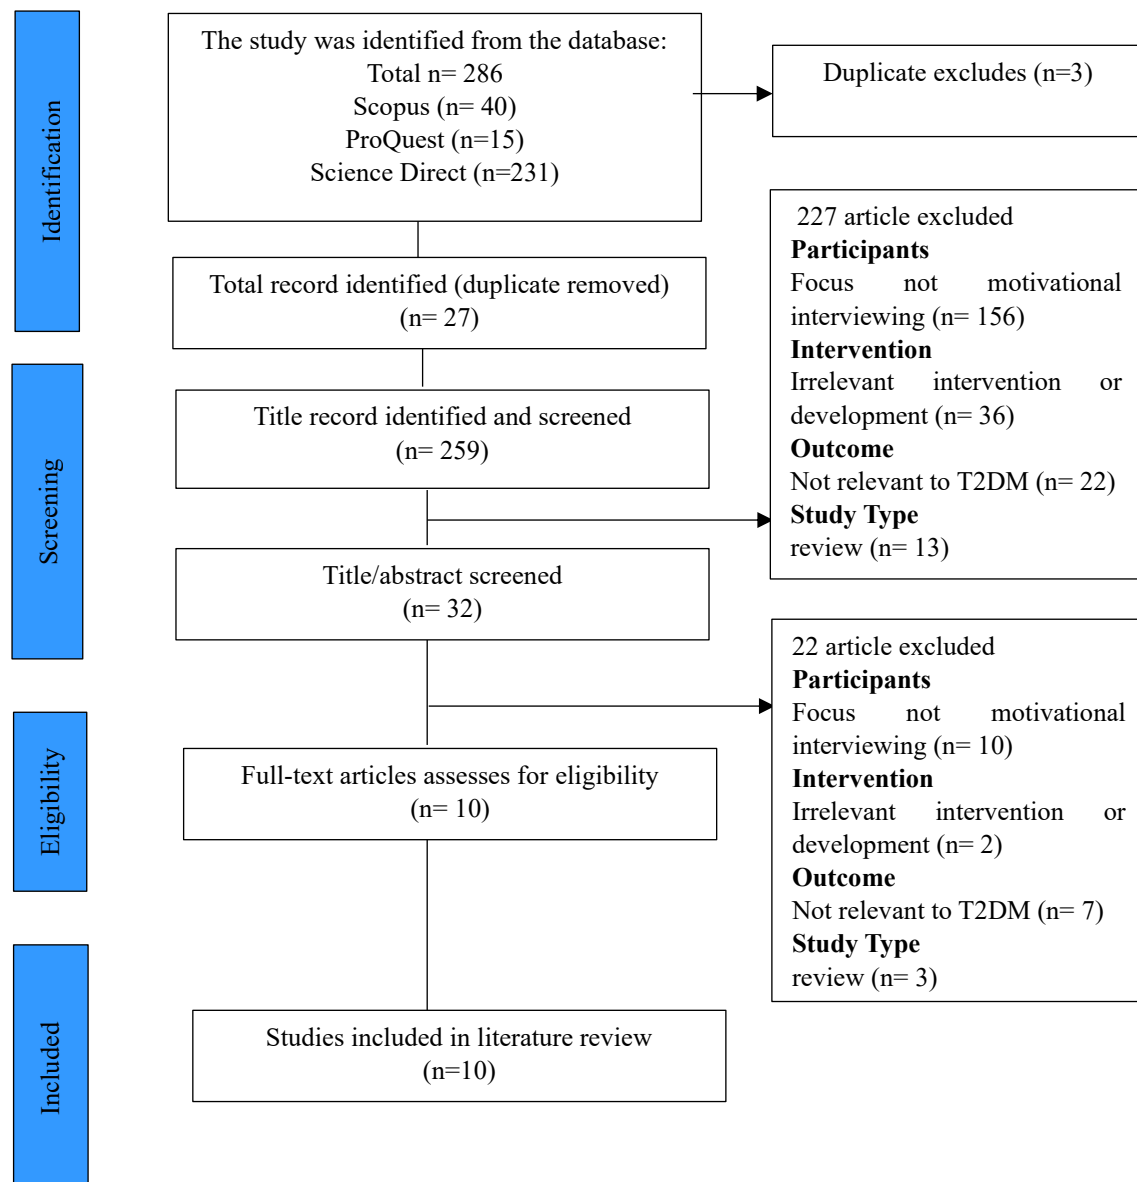

Source: https://medrxiv.org/content/10.1101/2023.12.19.23300108.full.pdf
